# Supplementary material
Source: Springer Nature journal article supplement (https://www.springermedizin.de/resource/supplementary/12985_2009_545_MOESM1_ESM.pdf/9608420)
Supplement: MOESM1 [file 9608420]

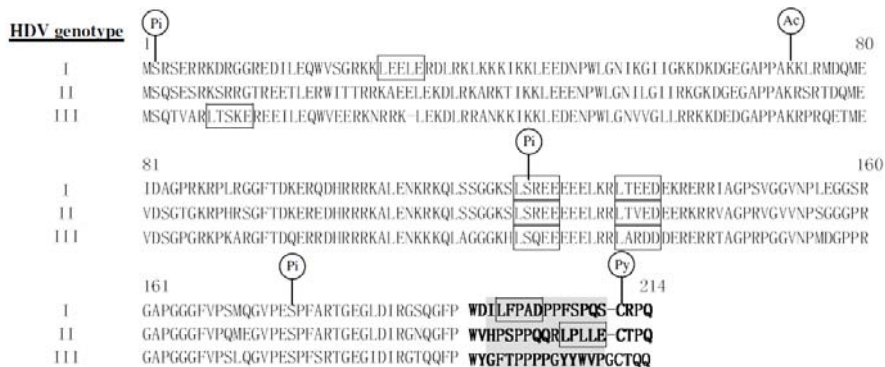

**Oligonucleotide**  
**Name**

**Sequences (direction)**

I L F P A D P P F S P Q S

GI(198-210)\_F AATTCATCCTGTGCCGGCGGACCCGCGTCTCTCCGCAGTCTTAAGATAATC G (5' → 3')

GI(198-210)\_R GTAGGACAAGGCCGCCGTGGCGGCAAGAGAGCGCTCAGAATTCATATAGCAGCT (3' → 5')

H P S P P Q Q R L P L L E

GII(198-210)\_F AATTCACCCGCTCTCCGCGCAGCAGCGTCTGCGCGTCTGGAATAAGATAATC G (5' → 3')

GII(198-210)\_R GGTGGCAGAGCGCGCTCGTCGAGACGGCAGACCTTATTCATATAGCAGCT (3' → 5')

F T P P P P G Y Y W V P G

GIII(198-210)\_F AATTCCTCACCCCGCCGCGGGTTACTACTGGGTTCCGGGTTAAGATAATC G (5' → 3')

GIII(198-210)\_R GAAGTGGGCGCGCGGCCAATGATGACCCAAGGCCAATTCATATAGCAGCT (3' → 5')
